# Supplementary material
Source: publisher figshare collection journal article supplement (https://karger.figshare.com/ndownloader/files/24118415)
Supplement: Supplementary file 1 [file 24118415]

Supplementary table 1. Performances of dichotomized UCEIS and MES for endoscopic remission

|  | UCEIS (95% CI) | MES (95% CI) |
| --- | --- | --- |
| Sensitivity | 41.7% (27.6% - 56.8%) | 66.7% (51.6% - 79.6%) |
| Specificity | 100% (75.3% - 100%) | 61.5% (31.6% - 86.1%) |
| ROC Area | 0.71 (0.64 – 0.78) | 0.64 (0.49 – 0.79) |
| PPV | 100% (83.2% - 100%) | 86.5% (71.2% - 95.5%) |
| NPV | 31.7% (18.1% - 48.1%) | 33.3% (15.6% - 55.3%) |

UCEIS: Ulcerative Colitis Endoscopic Index of Severity; MES: Mayo Endoscopic Subscore; CI: confidence interval; ROC: receiving operating characteristic; PPV: positive predictive value; NPV: negative predictive value.

Supplementary table 2. Performances of dichotomized UCEIS and MES on the need for colectomy

|  | 6 events  UCEIS (95% CI) | MES (95% CI) | Total events  UCEIS (95% CI) | MES (95% CI) |
| --- | --- | --- | --- | --- |
| Sensitivity | 83.3% (35.9% - 99.6%) | 100% (54.1% - 100.0%) | 69.2% (38.6% - 90.9%) | 92.3% (64.0% - 99.8%) |
| Specificity | 72.7% (59.0% - 83.9%) | 43.6% (30.3% - 57.7%) | 77.1% (62.7% - 88.0%) | 47.9% (33.3% - 62.8%) |
| ROC Area | 0.78 (0.61 – 0.95) | 0.72 (0.65 – 0.78) | 0.73 (0.59 – 0.88) | 0.70 (0.60 – 0.80) |
| PPV | 25.0% (8.7% - 49.1%) | 16.2% (6.2% - 32.0%) | 45% (23.1% - 68.5%) | 32.4% (18.0% - 49.8%) |
| NPV | 97.6% (87.1% - 99.9%) | 100% (85.8% - 100.0%) | 90.2% (76.9% - 97.3%) | 95.8% (78.9% - 99.8%) |

UCEIS: Ulcerative Colitis Endoscopic Index of Severity; MES: Mayo Endoscopic Subscore; CI: confidence interval; ROC: receiving operating characteristic; PPV: positive predictive value; NPV: negative predictive value.
